# Supplementary material
Source: Research Square preprint supplement (doi:10.21203/rs.3.rs-9142847/v1)
Supplement: Supplementary file 1 [file 57e21f359a94f6cbdbf222c6.docx]

# Supplementary files


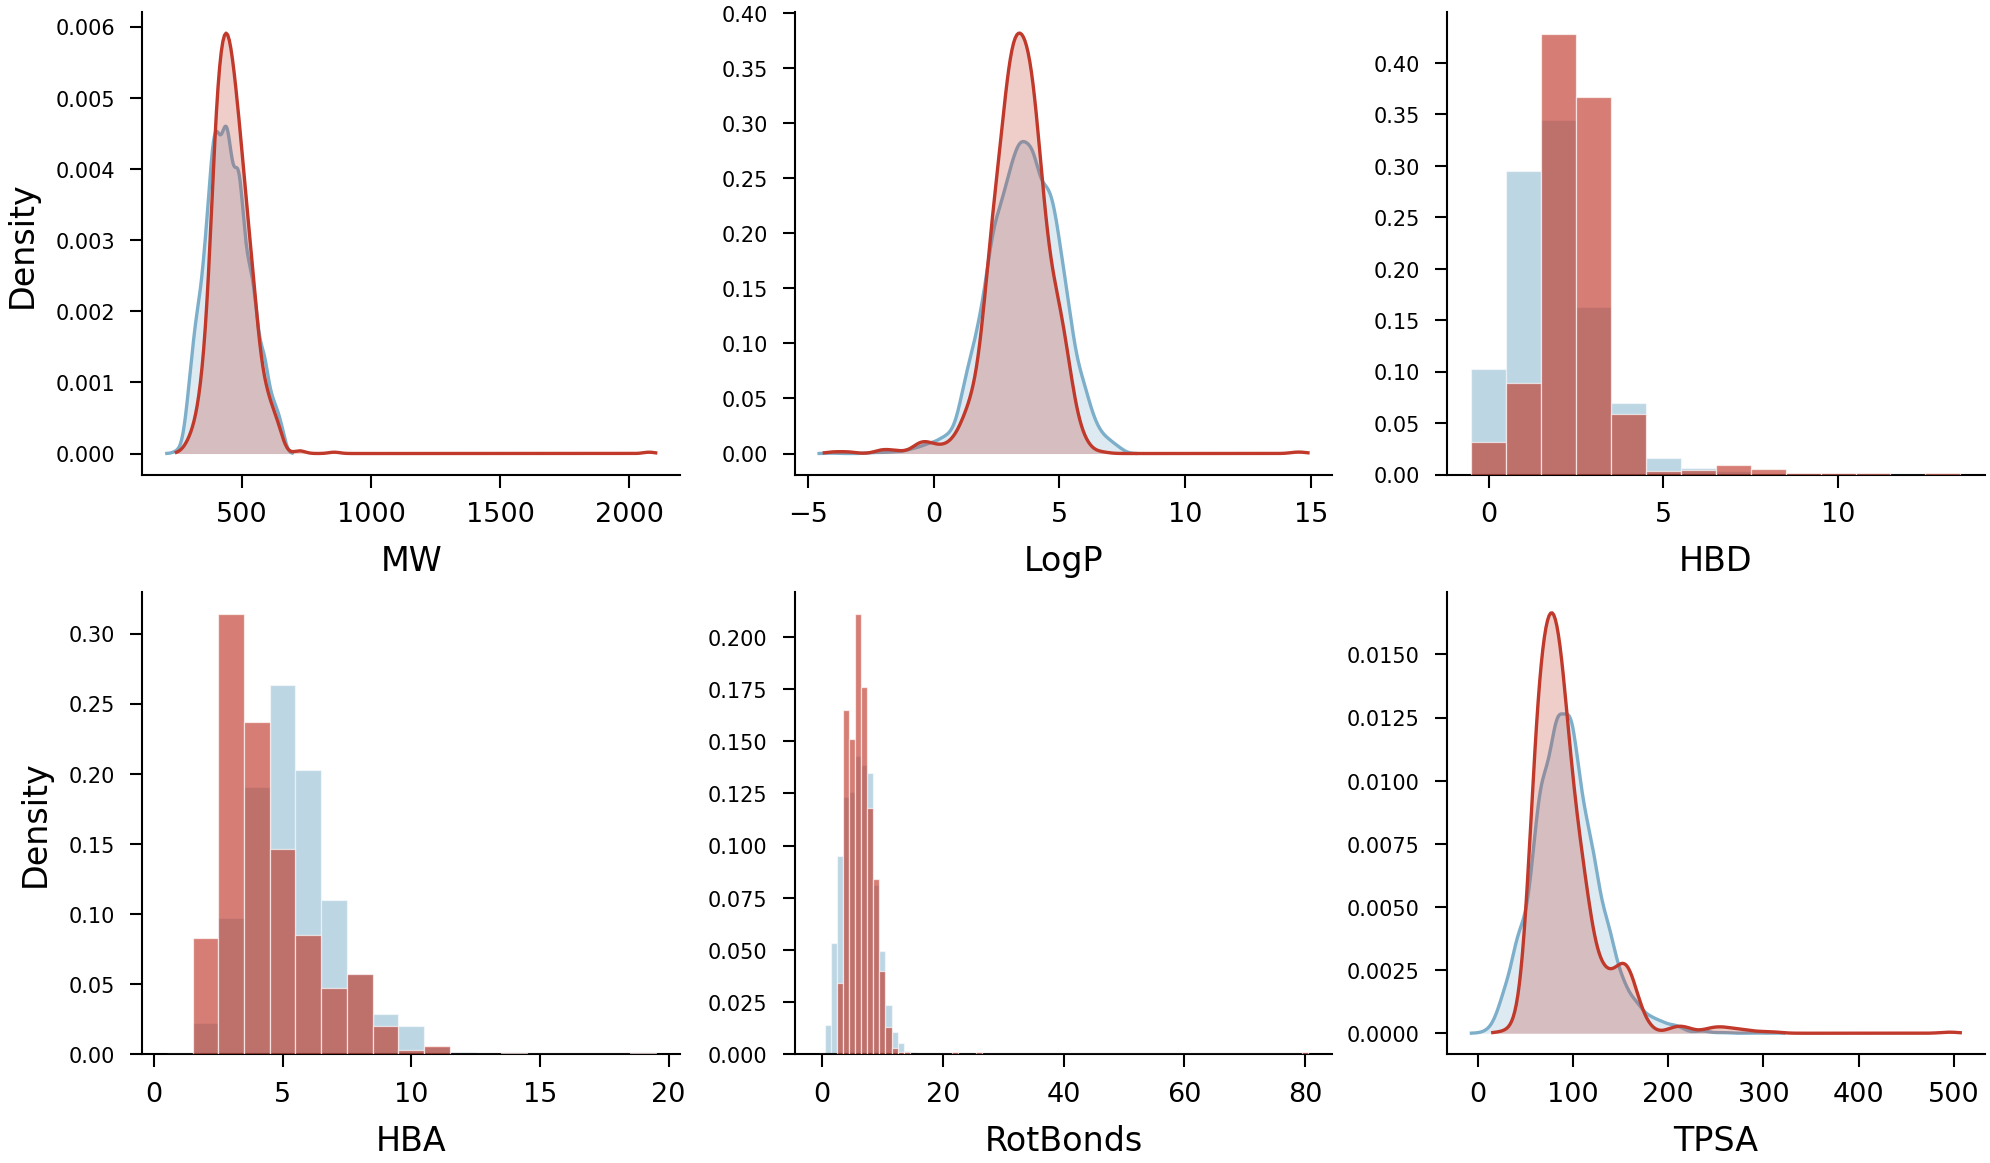


**Additional file 1: Figure S1.** Molecular property distributions for actives (orange) and decoys (blue). MW = molecular weight, LogP = calculated octanol–water partition coefficient, HBD/HBA = hydrogen bond donors/acceptors, RotBonds = rotatable bonds, TPSA = topological polar surface area. The overlap confirms property-matched decoy generation.


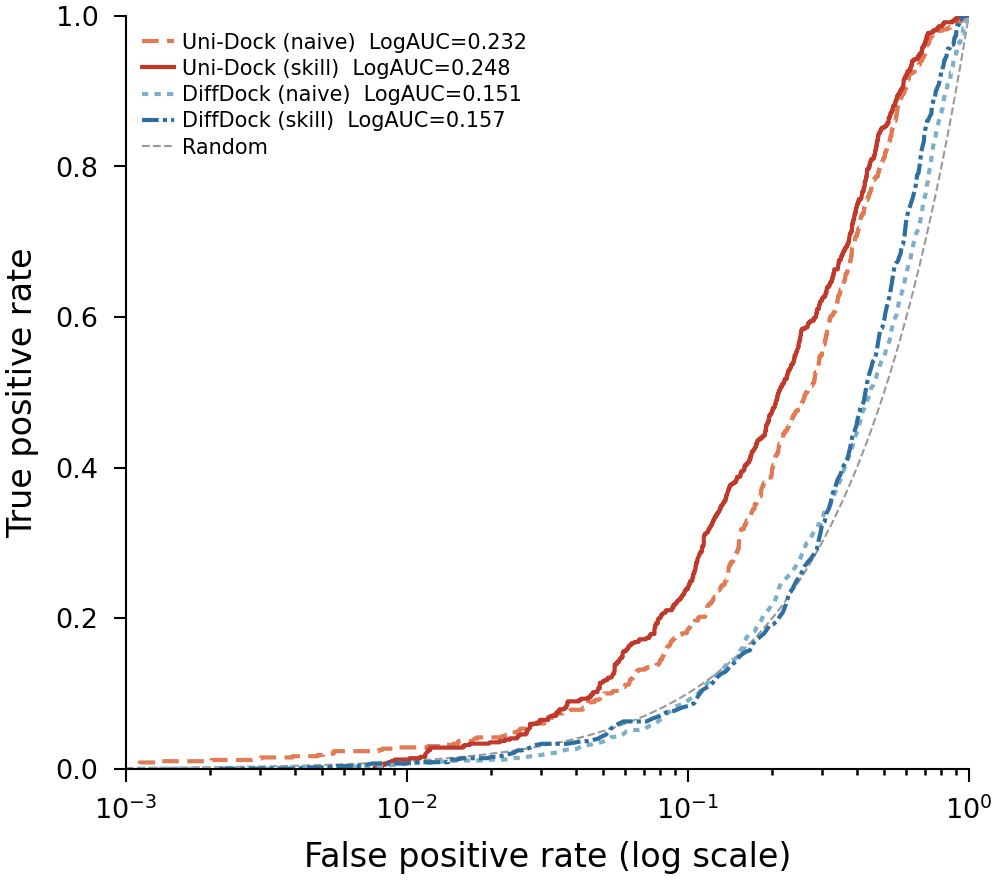


**Additional file 2: Figure S2.** Semi-logarithmic ROC curves (log10 FPR axis) for all four protocols. This representation emphasises early enrichment performance. The dashed line indicates random performance (LogAUC = 0.1446).


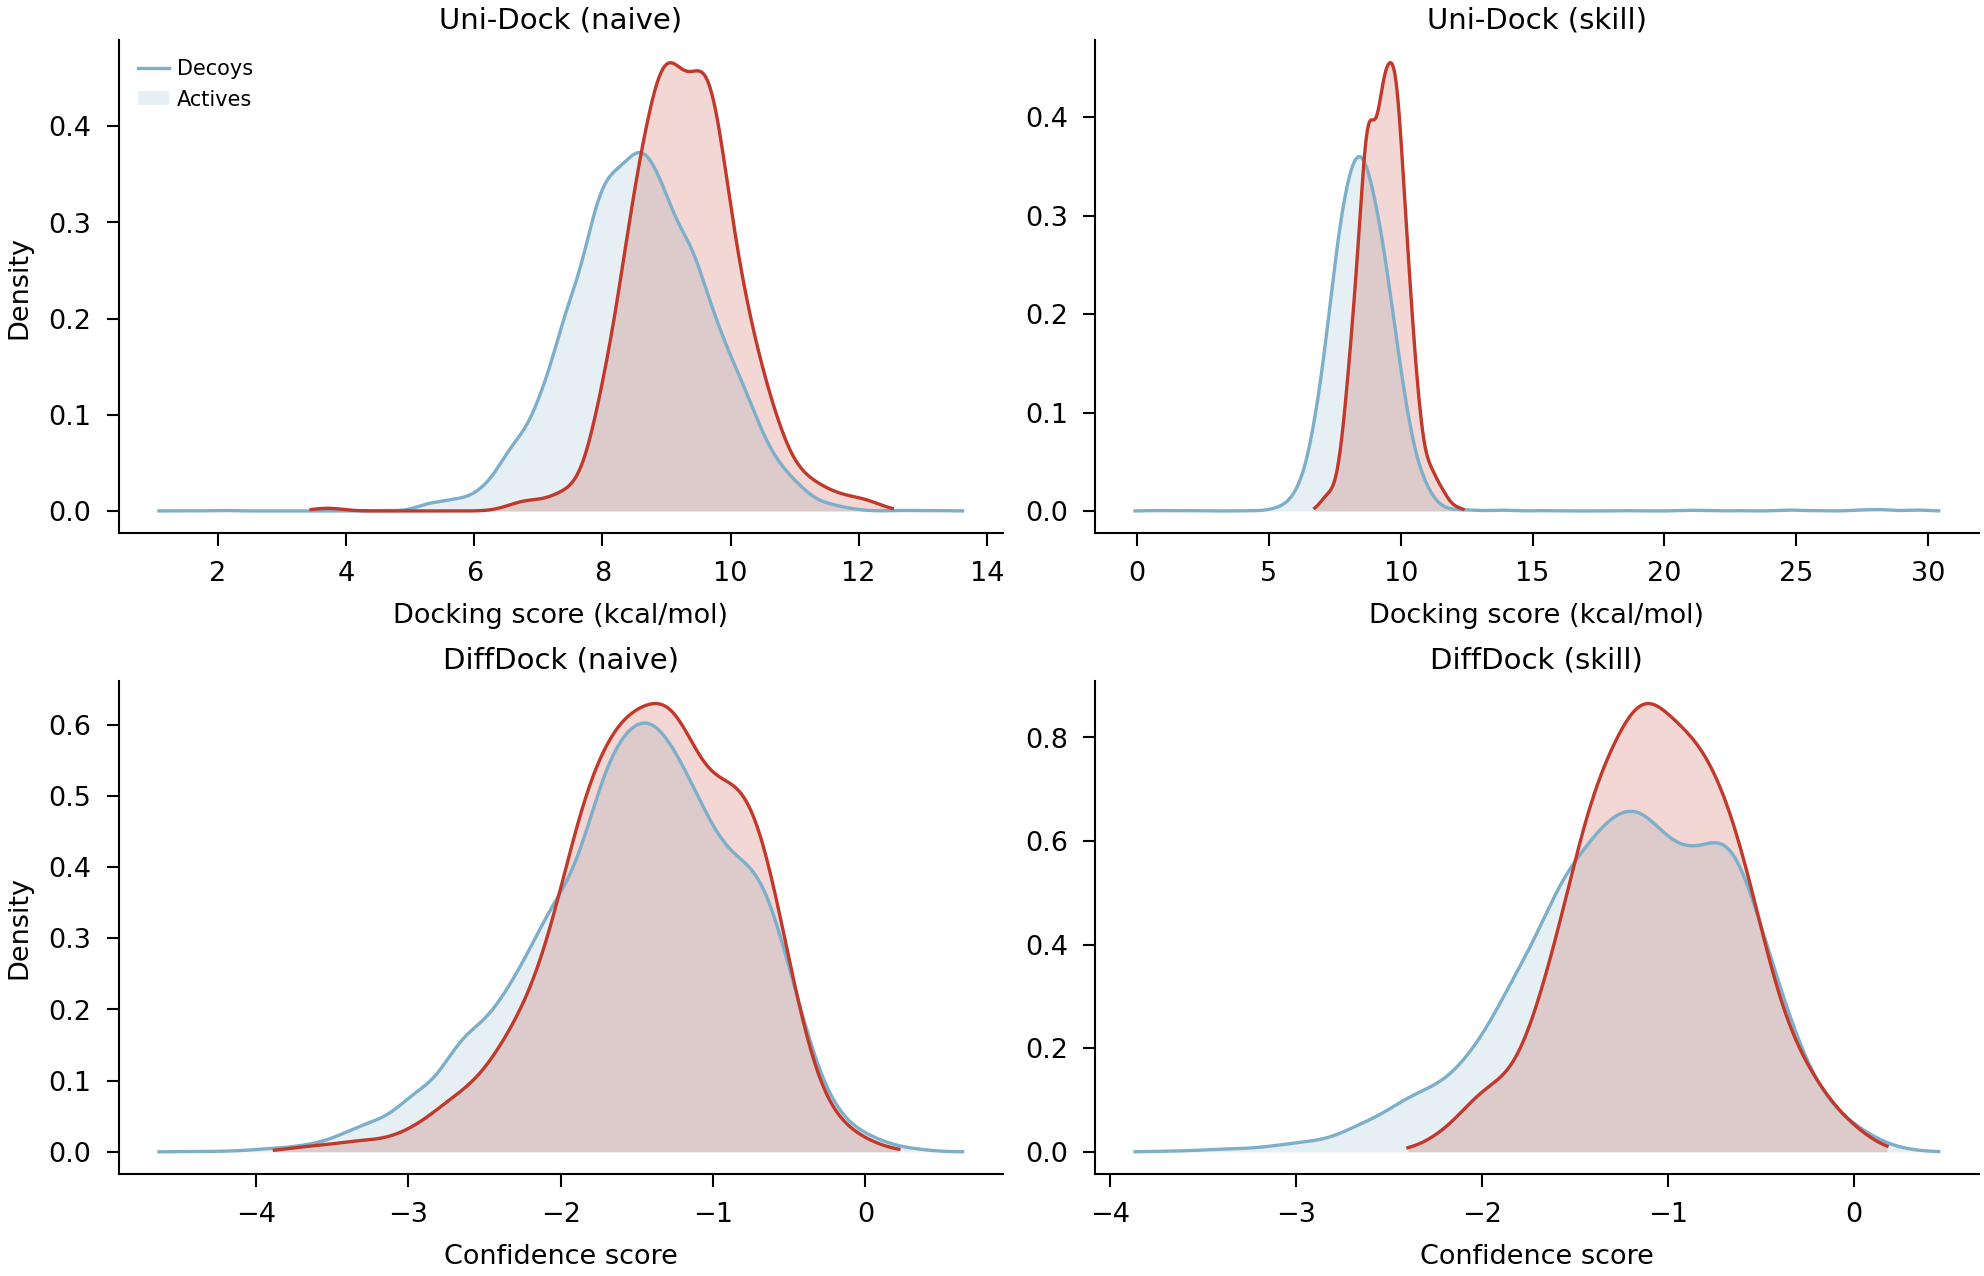


**Additional file 3: Figure S3.** Docking score distributions for actives and decoys across all four protocols. Kernel density estimates shown for actives (solid) and decoys (dashed). Greater separation indicates better discrimination.


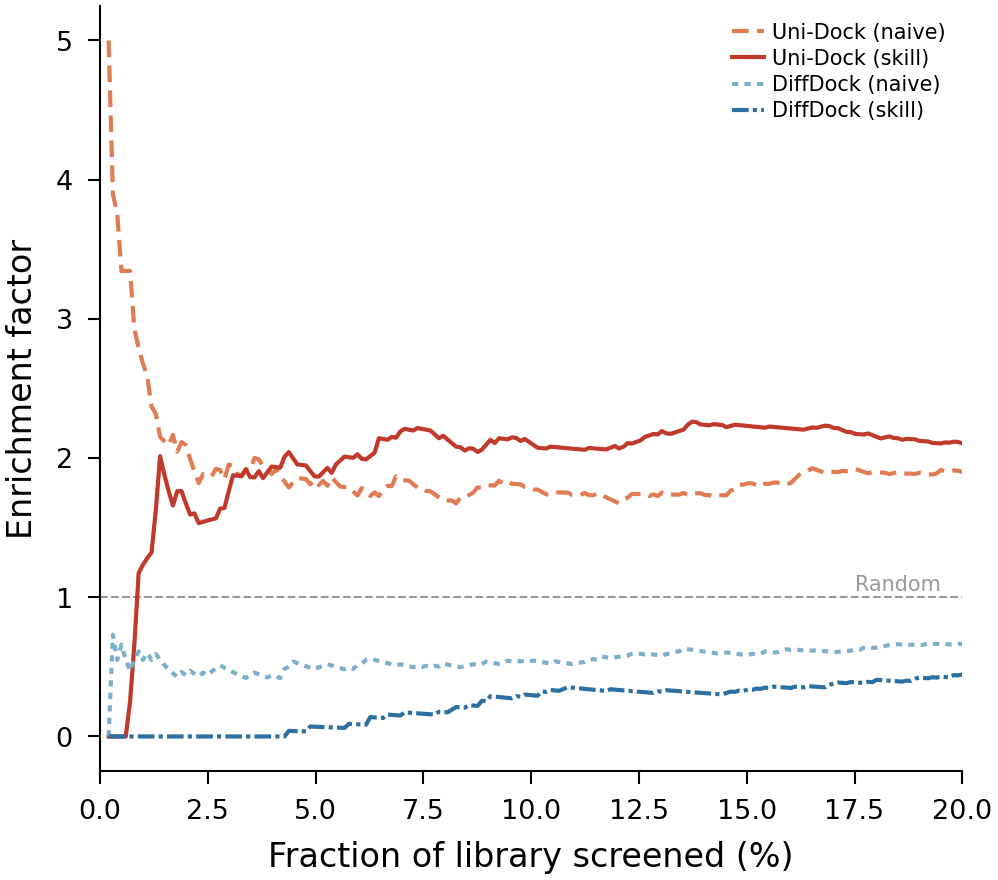


**Additional file 4: Figure S4.** Enrichment factor curves as a function of the fraction of the ranked library screened. EF = (fraction of actives found) / (fraction of library screened).


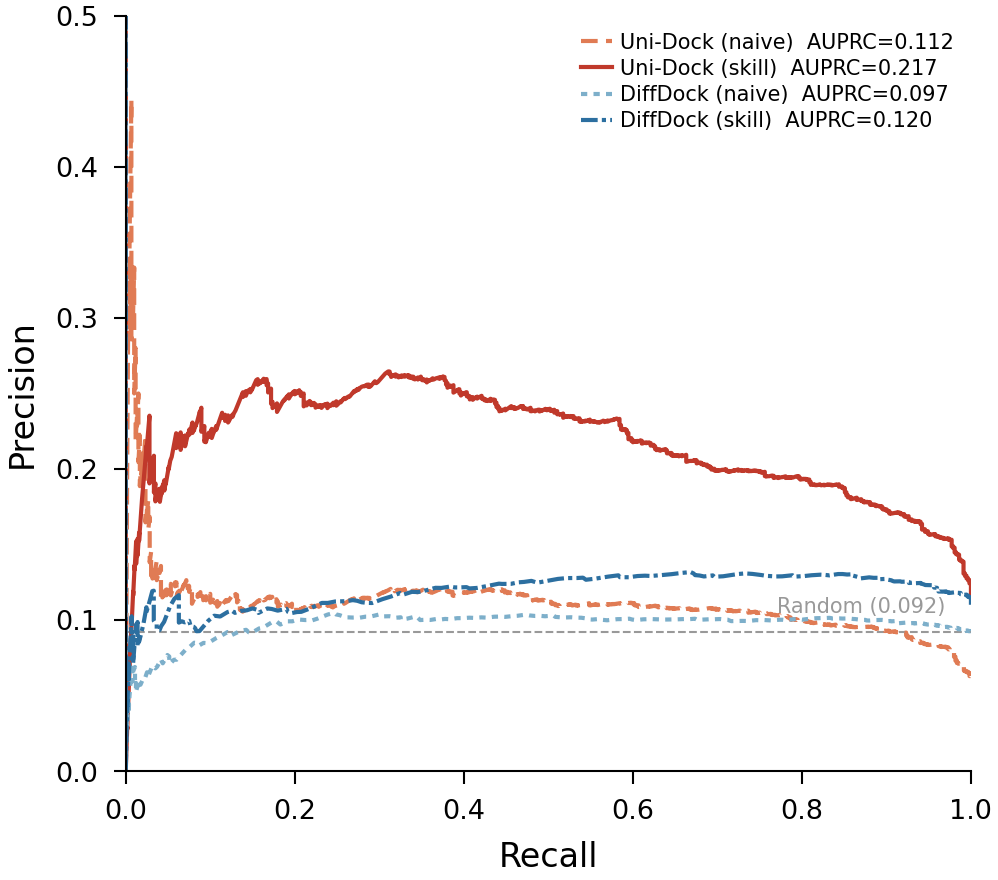


**Additional file 5: Figure S5.** Precision–recall curves for all four protocols. The dashed line indicates the baseline precision (active rate in the dataset).
